# Supplementary material for: Non-targeted blood metabolomics of giraffe and white rhinoceros by 1 H nuclear magnetic resonance spectroscopy
Source: Research Square preprint supplement (doi:10.21203/rs.3.rs-7722349/v1), 2025-10-18
Supplement: Supplementary file 1 [file 0579089d9ca0cc2706ad4115.xlsx]

## Sheet: Rhino Giraffe work file -EDTA
Non-targeted blood metabolomics of giraffe and white rhinoceros by 1H nuclear magnetic resonance spectroscopy
Running title: Giraffe and white rhinoceros serum metabolomics
G. Osthoff*a, Mason, S.b, Schmidt, L.a, Tordiffe, A.c, Deacon, Fd
		Concentrations in micromoles per liter
Animal nr	Species	Valine	Isoleucine	Leucine	2-Hydroxybutyric acid	3-Methyl-2-oxovaleric acid	2-Oxoisocaproic acid	Cholic acid	Glycocholic acid	Propionic acid	3-Hydroxyisobutyric acid	3-Hydroxybutyric acid	Lactic acid	Alanine	2-Hydroxyisobutyric acid	Acetic acid	3-Hydroxyisovaleric acid	N-Acetylglucosamine	Proline	Methionine	Glutamine	Glutamic acid	Acetone	Acetoacetic acid	Pyruvic acid	Succinic acid	Fumaric acid	Citric acid	Aspartic acid	Methylamine	Dimethylamine	Sarcosine	Trimethylamine	N,N-Dimethylformamide	N,N-Dimethylglycine	Lysine	Ornthine	Dimethylsulfone	Choline	Creatine	Creatinine	myo-Inositol	Methanol	Glycine	Glycolic acid	Threonine	Glucose	Mannose	Allantoin
F1	G	25.5972	13.1317	13.4307	1.38752	1.91835	2.57661	0	0	4.19132	3.59892	43.2512	2096.26	49.8523	1.51225	62.9003	1.25972	1.8075	31.9812	12.6117	30.2996	51.7325	0.664823	1.13572	15.755	15.2163	1.02123	16.5186	0.57902	0	0	0	0	0	0.45093	6.20772	4.92991	5.60262	1.33448	32.2073	13.9234	10.6799	2.96283	109.514	7.49594	26.1939	386.299	5.40968	16.8166
F2	G	26.0611	13.6724	15.5515	1.61657	1.07181	2.58749	0	0	1.63685	1.86635	32.0884	1816.85	51.299	1.29416	21.32	1.11752	1.19693	26.1184	10.4307	23.2686	31.7074	0.517953	0.968193	11.6029	10.3978	0.812134	9.78981	0	0	0	0	0	0	0.196386	7.83826	2.44071	2.80372	1.0252	35.8418	10.2229	6.76369	2.51909	125.922	5.51112	9.07588	205.562	9.20737	11.6303
F3	G	17.8378	7.58153	8.68928	0.96512	0.774597	2.04819	0	0	1.9212	2.85081	21.3913	817.488	25.151	0.717912	27.5403	0.721955	0.89566	17.5093	6.27854	15.4275	21.3499	0.422886	0.747049	6.81407	5.51025	0.593667	8.74244	0	0	0	0	0	0	0.588506	2.53441	2.40543	5.65152	0.667942	13.4184	7.38926	5.84588	1.79508	143.832	3.73411	10.1868	149.153	4.41276	9.84459
F5	G	20.5155	7.88362	9.50188	1.16274	0.997459	2.09105	0	0	1.73611	2.77458	19.894	1088.15	33.4635	1.01574	19.6175	0.909562	1.21526	23.9708	8.62745	18.3486	30.8069	0.565449	0.845016	8.64104	5.82909	0.669864	11.0928	0	0	0	0	0	0	1.39357	3.27503	2.23424	9.54379	0.873244	10.618	10.9654	6.69394	2.10639	98.6284	3.38588	4.33776	99.8657	6.62246	13.1578
F6	G	10.3028	2.85713	2.70205	1.54858	1.49534	1.98895	0	0	1.77954	2.89634	25.2718	1258.83	23.9321	1.34566	204.02	1.01668	1.04771	15.0766	1.92628	11.7836	13.0827	0.703758	0.592326	6.82492	17.2888	0.911753	12.7516	0	0	0	0	0	0	0.229986	2.17951	2.50612	3.55728	0.529937	13.843	8.40191	3.7256	1.23822	69.626	2.60767	3.72676	266.205	3.22443	10.7323
F7A	G	28.7598	11.7652	14.2573	1.31957	1.77156	2.17569	0	0	2.94121	2.70974	33.0768	2028.24	50.1789	1.64754	41.167	1.07004	2.09509	29.2134	11.1043	24.1739	36.3025	0.586084	1.07987	14.6711	12.596	0.949772	17.5273	0	0	0	0	0	0	1.07238	4.64925	4.5537	7.58556	1.07933	27.2612	13.9514	11.9868	2.64488	37.0874	5.25661	16.441	270.122	6.74108	18.4383
F7B	G	10.741	4.72142	5.64313	0.767504	0.660721	1.3778	0	0	1.78584	1.63503	14.4365	751.207	17.2067	0.625759	18.2249	0.686304	0.783744	13.9639	5.19821	12.1234	18.43	0.38697	0.443141	7.15491	3.74144	0.603985	6.27264	0	0	0	0	0	0	0.0854829	1.92255	1.73695	3.22515	0.559901	15.0831	5.88803	4.47882	1.38526	166.555	2.67284	1.16919	111.615	4.92831	8.63133
F8	G	14.2527	4.01849	4.87418	1.7	1.83465	3.64385	0	0	3.43552	2.66948	27.0079	905.313	31.5231	1.38479	277.264	1.02916	1.11016	22.6077	2.88077	23.1704	12.2691	0.743138	0.699743	25.0475	20.7584	0.199954	7.34671	0	0	0	0	0	0	0.833707	1.96128	2.15899	15.0238	0.490401	11.6996	13.8703	8.93385	1.5154	39.4861	2.89922	7.68693	271.911	7.08135	15.6781
F9	G	14.9945	7.14994	8.4892	0.95894	0.916075	1.69505	0	0	1.60911	1.70135	20.8708	1142.24	24.1082	1.05153	26.2223	0.879731	0.951853	18.3427	7.06074	15.6915	24.9374	0.429336	0.610311	8.94175	5.83322	0.576009	8.7575	0	0	0	0	0	0	0.16818	2.84756	2.62372	3.26466	0.787213	21.3347	8.50556	6.39129	1.78831	49.4276	3.44289	8.15408	206.31	5.73048	11.0163
F10	G	14.0492	6.1854	7.20636	1.29489	0.924075	1.79575	0	0	1.51975	2.10001	24.4407	1650.07	21.9615	1.70988	21.6977	0.943834	0.963299	18.3748	6.42671	14.85	25.1351	0.781593	0.607268	9.84024	5.36417	0.549383	12.5937	0	0	0	0	0	0	0.168074	2.70598	1.89291	6.47763	0.745107	21.3298	12.5656	8.68503	1.59294	40.8083	3.25446	9.73158	167.549	4.77556	12.6184
F11	G	16.8655	7.76893	7.69848	0.819178	0.91028	1.57346	0	0	2.15815	2.36179	22.2044	1085.26	24.5208	1.28207	30.5212	0.872343	1.04644	19.3824	8.08871	17.2917	31.4638	0.472074	0.68512	9.62874	5.5387	0.648205	8.28801	0	0	0	0	0	0	0.361538	2.35664	2.2632	2.38506	0.626151	13.4571	8.60076	4.5889	1.9002	143.883	3.80952	10.7007	217.911	5.02254	11.435
BF2	G	38.8222	16.291	21.4436	1.44236	1.36027	2.62703	0	0	2.41637	3.26102	40.1357	2192.16	50.5945	0.374691	47.6234	1.20958	1.97991	24.6573	9.9295	25.4193	44.0961	0.943168	1.66489	27.737	11.7524	1.04109	32.5234	2.2276	0.623631	1.10888	0.918556	1.74152	0	0.389213	10.2125	8.6185	12.0009	9.07676	22.975	16.9644	13.5564	11.534	45.265	9.68997	23.4213	442.393	8.85913	21.1384
BF7	G	36.196	16.1726	18.3422	1.33164	1.12155	2.43135	0	0	1.84538	2.60308	33.3051	2200.06	48.4121	0.935855	23.0541	1.48324	2.49407	28.2149	12.6077	20.8559	48.7597	1.02794	1.49278	22.8214	12.4669	0.809968	39.9153	2.48004	0.743325	1.28103	1.90856	1.35344	0	1.04728	10.3553	9.70465	11.4189	9.19178	23.4826	18.3951	17.8297	12.8125	36.7053	18.6777	26.5441	297.941	8.62814	21.8215
SVF1	G	48.2441	20.9285	16.8942	3.11705	2.52433	3.77665	0	0	2.96666	5.92768	51.7025	571.088	47.843	1.14302	76.6488	1.40771	2.66891	42.7101	16.2158	29.66	63.1931	1.5084	1.70417	10.3621	9.63159	0.427519	30.0315	0.631151	0	0	0	0	0	0.682344	10.6419	5.51072	4.73106	2.12741	46.0278	17.3785	13.6057	22.896	371.292	22.7701	16.9159	113.312	8.20753	22.3221
SVF2	G	39.282	18.903	17.9457	2.51069	1.83064	2.99889	0	0	2.68771	4.86928	66.9405	279.748	31.2152	0.681733	123.296	1.60056	1.95476	38.6216	12.9181	34.056	55.8101	1.07609	1.65298	10.1986	14.7465	0.491958	22.5147	0	0	0	0	0	0	0.329588	7.29169	4.7532	3.24202	1.8612	42.656	14.1642	12.1276	14.6533	225.536	16.162	11.1061	256.205	10.391	19.6317
M1	G	34.5033	14.3821	16.8875	1.34586	1.05353	2.67798	0	0	1.47859	2.7247	28.1058	1951.8	37.7098	0.919346	16.8108	1.35441	1.93248	28.3904	11.1184	23.5035	36.1547	0.589238	1.2516	11.2747	8.39192	0.669246	16.9396	0	0	0	0	0	0	0.497797	7.20778	4.67149	6.40123	1.39138	29.1718	11.0802	7.86632	2.60775	40.3712	5.53708	18.1429	167.635	7.73214	16.4329
M2	G	23.3241	8.50927	10.4279	1.22698	0.776294	1.80624	0	0	1.32881	2.06811	12.6186	595.682	27.4639	0.533333	16.3298	0.695521	1.6721	21.4197	7.67952	16.4301	22.9707	0.480323	0.92528	6.76506	4.57655	0.451845	10.2378	0	0	0	0	0	0	0.737947	2.87778	3.77706	10.0259	1.0811	15.6962	10.1579	6.40827	2.39521	45.4411	4.10834	8.00288	254.834	6.79918	12.8632
M3	G	10.4959	4.27723	4.69788	0.743911	0.478533	1.33065	0	0	1.76351	1.53038	12.3342	823.224	14.566	0.643695	7.19346	0.636156	0.665633	13.4478	4.45421	11.974	13.6283	0.429897	0.378215	8.63352	3.59195	0.451271	4.4886	0	0	0	0	0	0	1.13359	1.6192	1.72544	6.42098	0.480165	12.0445	5.82273	4.12505	1.38586	47.3486	2.19241	3.43059	109.943	5.02719	9.08776
M4	G	21.3855	9.19095	11.5377	1.32024	1.30328	2.10775	0	0	2.28168	1.93948	24.6662	1386.75	28.154	1.45804	32.3478	0.832152	1.11958	18.9869	7.25443	17.0338	27.2072	0.534085	0.909148	11.4213	7.7102	0.686205	10.495	0	0	0	0	0	0	0.283636	3.61159	3.29467	16.3456	1.03145	22.5474	10.3442	6.57959	2.28461	121.021	4.59032	14.5266	311.448	5.55465	13.1285
M5	G	21.2448	9.31545	10.6491	1.05081	1.1729	1.93023	0	0	1.47889	1.61089	20.9556	1109.89	42.4434	1.34007	27.3204	0.861051	1.59007	25.5768	10.1112	22.966	37.0286	0.679278	0.930654	13.8693	6.88936	0.579938	17.7401	0	0	0	0	0	0	0.427874	5.13744	4.07339	4.17865	1.34625	24.9261	14.5843	7.7158	2.51851	75.4724	6.1339	13.2212	219.542	7.1735	15.1792
M6	G	34.1108	12.6059	16.7493	1.47703	1.11953	2.56282	0	0	1.97621	2.2903	25.2728	1638.7	39.1832	1.80475	46.4134	1.20826	2.72488	29.0239	11.8924	22.1504	42.3864	0.724131	1.35371	15.7806	7.92299	0.707708	14.3417	0.520752	0	0	0	0	0	0.227615	6.36408	4.83908	6.52617	1.18574	24.2499	16.1103	9.45409	4.95921	39.7671	6.4913	20.6304	258.97	6.46287	20.0239
BM2	G	25.3501	9.86482	13.3887	1.03304	0.847886	1.70289	0	0	1.97864	2.31061	27.3531	985.644	45.2913	0.501241	34.7709	0.938099	2.49393	28.4395	14.548	24.0889	58.8586	0.897768	1.18498	22.9922	9.10508	0.854948	39.6309	2.26982	0.562145	1.79366	2.05725	1.14841	0	0.69001	8.16559	9.04325	12.3795	10.1734	25.5	17.7763	15.8985	12.091	41.764	19.6665	20.3984	342.409	8.16203	18.2036
BM3	G	24.0492	10.3339	13.7857	1.27638	0.864457	1.8992	0	0	1.11197	2.74457	24.6663	1440.16	51.9718	0.852039	20.1794	1.15952	1.49381	27.8112	12.1206	22.3665	53.0687	0.952656	1.01594	21.3001	7.52267	0.999763	41.4287	1.75029	0.719748	1.00287	1.0197	1.38038	0	0.410904	7.34518	8.36364	12.7493	10.2604	20.5209	19.6167	13.0632	11.4296	48.0919	8.80143	24.6478	295.082	6.87142	18.5617
BM5	G	26.5624	10.9762	14.0738	1.14197	0.943291	2.05285	0	0	1.53573	2.90459	23.7398	1749.53	66.364	1.12093	18.8833	1.2559	2.2143	26.9868	12.6959	23.9953	50.9096	0.955376	1.08673	22.1694	11.239	1.11124	51.7505	1.88426	0.796596	1.25073	1.75838	1.33943	0	0.402266	8.66727	8.77182	9.93921	9.08709	22.0966	20.8089	10.5789	10.42	47.9574	12.5056	24.7961	342.744	7.22305	20.8748
BM7	G	31.4336	12.1228	16.9363	1.34256	1.11835	2.08739	0	0	1.51867	2.92539	30.6453	1967.7	48.2812	0.930371	33.8951	1.48728	1.76999	24.9788	10.9472	21.9225	46.8719	0.887694	1.34144	28.9426	9.33927	1.20237	42.9008	1.95169	0.600816	1.11941	0.993689	1.44632	0	0.408689	8.31643	7.63978	11.7901	8.11296	21.8641	19.4306	13.6103	11.5574	48.8577	9.01082	23.7402	470.115	7.886	22.9125
BL46	R	32.5773	11.4913	22.293	1.17549	1.96378	3.37306	0.795464	0.652246	1.98391	4.25507	24.0083	1321.15	55.8617	1.41319	59.6362	2.57785	10.2603	40.7404	18.6628	28.708	76.4818	1.19081	1.24387	10.0734	8.24334	0.516069	57.029	2.51884	1.35868	1.90711	2.23239	1.00146	0.435799	0	9.78076	13.1855	15.2455	9.00884	22.7063	12.3783	15.3532	14.8327	17.3099	24.2382	37.2572	319.255	6.22769	15.3546
BL40	R	52.5256	17.674	30.1385	1.61081	2.77646	4.12562	2.04582	1.8832	5.3849	5.09837	53.9164	1832.81	66.3694	1.15766	169.975	3.76799	14.5591	38.7314	14.4221	36.1566	70.5127	1.56492	2.06513	4.5318	13.5904	1.30875	70.3306	2.13271	1.40189	2.10728	1.37079	0.993951	2.70292	0	10.168	14.8041	20.1103	11.9747	17.7881	19.6503	16.5973	109.583	20.7698	10.2768	36.6075	240.743	6.744	9.89142
W20	R	32.1712	11.1022	17.4867	1.24889	1.7082	3.01956	0.71857	0.652212	1.65041	4.25984	31.8807	1304.21	69.2052	1.24422	58.3855	3.58525	9.24588	33.5088	14.7132	27.2688	60.4442	1.64695	1.33386	9.65368	9.23565	0.582818	58.0582	1.83543	1.29743	1.60682	0.879488	0.642567	0.448529	0	7.32992	10.7974	15.9313	9.62584	15.6033	14.4995	11.2868	36.5979	29.2759	8.97168	30.4716	256.355	6.34773	13.4398
BL11	R	55.685	16.757	26.2251	1.21836	2.73699	3.33888	2.15895	1.71763	3.96683	4.17151	46.8236	333.364	52.8652	0.435072	124.647	3.53457	27.2061	34.6823	13.3958	25.6559	56.0025	1.54021	2.1253	3.50839	8.55098	0.448305	64.466	1.73239	1.2722	1.41352	0.953219	0.55323	1.49672	0	8.56961	14.8334	16.89	10.836	15.8666	18.9145	12.8009	127.898	17.8572	8.17527	28.9623	197.274	3.56051	7.47895
BL19	R	50.4174	15.5436	25.6007	1.16738	1.9949	3.54808	1.7487	1.36297	2.56935	4.5926	32.3362	597.991	62.4261	0.63689	105.966	2.95525	9.70238	37.7673	16.1643	27.6923	62.6087	1.49662	1.94298	6.35241	7.1971	0.616945	62.6439	1.88206	1.34518	1.56455	1.08026	0.820282	0.732221	0	9.85723	14.0095	17.3931	13.4321	17.7052	15.3398	13.089	49.0908	20.9805	9.39052	33.0192	222.386	6.7086	14.0919
W52	R	58.3035	17.5767	29.664	2.13706	3.90098	5.13592	2.44237	1.94322	6.38407	8.20308	62.8089	3138.84	84.6607	2.32603	191.371	5.19031	9.69611	46.2736	17.6191	42.3748	81.0867	2.41787	2.22891	11.1786	14.9557	1.44206	82.1377	4.31868	1.85556	2.52185	1.81258	1.00919	1.64149	0	12.7228	18.1546	19.3944	12.5124	22.9241	25.1765	20.7738	99.8814	27.0603	15.0984	53.3015	405.096	9.91807	11.1956
W21	R	33.1435	9.96515	23.8018	1.70525	3.30663	4.3213	1.31814	1.02946	4.22891	5.43361	33.904	1614.35	55.9974	1.8865	121.681	3.83964	4.29457	46.0724	17.1082	34.9339	76.8846	1.68376	1.42043	9.74346	8.72887	0.316868	60.5102	2.26734	1.50262	1.93902	1.4919	1.46273	2.6291	0	11.2148	12.6195	17.7393	9.94247	26.7605	13.3393	15.3003	113.33	21.4502	24.1934	46.1986	325.691	5.58826	17.1275
BL9	R	42.776	13.9113	22.9349	1.27615	2.41562	3.04885	1.99529	1.55463	3.45042	5.28918	26.518	581.466	62.4598	0.581446	110.615	3.50968	18.8626	35.6532	15.997	26.8956	64.7755	1.35478	1.62524	5.17405	7.19068	0.528205	60.7558	2.14005	1.21698	1.80934	1.95668	0.9399	1.86367	0	9.84137	13.5386	16.6297	12.5054	20.1398	16.3395	13.1278	75.6422	22.7736	10.1293	31.8846	320.301	7.65281	13.7738
BL10	R	44.3468	14.4787	22.934	1.16745	2.30429	3.95161	2.13509	1.66392	2.20651	4.87303	38.7562	1169.27	71.5452	1.24354	86.5048	4.41441	26.0063	32.2453	12.5198	24.4868	56.0615	1.41167	1.63714	9.91905	8.50578	0.995298	61.2559	1.6751	1.33085	1.71694	1.1134	0.561992	0.62108	0	8.43445	13.5609	19.0228	10.7422	14.6112	19.6883	15.0213	53.2032	30.3648	10.6787	32.8167	320.075	6.13377	8.06536
W10	R	42.911	13.1057	22.7956	1.58527	2.66242	3.99361	1.11381	0.816946	3.54627	5.95102	47.8366	2318.86	76.8975	2.45678	127.697	4.06804	10.4733	35.1455	14.3791	31.5727	66.2207	2.72625	1.72175	14.5019	15.7072	1.36005	64.7601	1.9901	1.44335	1.85237	1.41209	0.749546	1.84689	0	8.43574	12.2909	18.9043	9.336	20.6663	14.1529	14.022	72.7145	24.1402	10.4353	42.3903	317.115	6.30515	12.4857
BL51	R	24.9355	8.13081	16.7654	1.43118	2.39132	3.57173	1.1738	0.86673	2.03275	5.55231	25.5489	732.98	42.3448	1.20423	61.3122	3.51669	4.12232	36.6501	15.7047	27.833	70.9535	1.29859	1.08618	9.78544	7.57786	0.289542	65.0949	2.95195	1.34228	2.29976	3.54199	1.66642	0.808126	0	10.7732	12.1152	17.6469	13.3878	21.95	12.8455	13.5755	62.1622	20.3034	44.2278	31.35	245.838	6.66384	16.4979
P10	R	44.1203	15.3377	24.5643	1.59339	3.70879	4.26563	1.40828	1.32631	7.4122	5.83402	35.9205	1078.92	64.3841	1.14521	142.106	4.03606	11.9403	38.4015	13.6607	33.059	60.7387	2.1288	1.7407	8.05172	14.2509	0.720559	57.4833	2.97701	1.46011	2.23581	2.63508	1.30572	0.85409	0	11.8175	16.4826	14.2837	10.3629	29.767	18.5284	16.0259	67.3646	19.0771	27.4444	37.5835	494.33	5.42494	14.6248
BL1	R	41.4665	13.366	22.1671	1.28601	2.1132	3.35736	2.18786	1.59146	3.45375	4.93682	34.7205	1349.57	59.1619	1.1023	117.346	3.04493	13.1308	29.274	13.6951	24.0984	62.0745	1.46127	1.67638	6.8046	10.7435	1.04517	55.9973	1.61645	1.28064	1.72498	1.43441	0.723471	1.16943	0	10.1933	14.6365	16.3149	11.6006	15.3429	19.3141	14.7647	78.5005	22.6009	10.9925	37.0024	446.564	9.86525	8.18317
W54	R	40.0125	13.213	22.5869	1.326	2.91465	3.23754	2.00877	1.85177	3.25149	5.32696	34.7998	882.741	62.0239	0.806723	104.28	2.96695	10.6929	30.3857	11.6869	25.4873	53.4046	2.2622	1.63733	5.9042	7.2608	0.598692	67.6494	1.64471	1.26008	1.42616	0.921492	0.689044	1.51752	0	8.36221	13.7986	16.2729	11.2584	16.1105	17.3924	13.5551	72.6858	28.6353	9.76111	33.2855	291.101	6.47047	9.47672
P9	R	51.9495	15.6145	27.8962	1.40715	3.02358	4.17261	1.818	1.4447	3.90015	5.36422	50.5553	1740.36	67.3781	1.53393	143.182	3.72353	10.8919	35.4017	14.0758	28.2227	65.0919	2.00924	1.98954	9.616	13.6731	1.01496	60.9152	2.90056	1.49536	1.91925	1.78661	0.834017	0.862462	0	10.3673	13.6996	17.7262	9.14904	20.7382	18.0046	16.262	78.8035	21.5549	9.84592	40.7475	309.909	5.89256	13.2154
BL38	R	47.0013	14.9207	23.1755	1.24242	2.30465	3.35902	1.83202	1.56263	2.03395	4.96208	33.4623	371.859	58.8236	0.561143	119.6	3.83132	12.9107	33.1303	14.6037	22.8491	62.2398	2.01207	1.80475	6.54899	6.91122	0.395348	61.1318	2.19053	1.38781	1.45731	1.34607	0.674666	0.319417	0	8.83834	13.1686	15.2636	9.90459	14.8435	16.0359	10.4691	11.8561	16.4722	8.13538	27.6852	234.802	5.52649	9.13058
W41	R	52.3907	16.3369	24.2135	1.53695	2.14788	3.4109	1.69059	1.39789	2.67149	5.33476	58.9446	2057.21	59.3143	2.25924	145.055	4.0714	19.634	30.8088	12.8542	23.3922	59.8639	2.45262	2.06819	15.5476	12.1328	0.742704	69.8696	1.96855	1.51913	1.7279	1.42757	0.679496	0.382779	0	9.46362	13.8881	17.122	11.3095	15.2214	18.9557	12.7991	24.4085	19.5823	9.22133	35.6152	310.026	5.09107	7.0503
W9	R	50.1956	17.2845	28.7764	1.68076	2.88865	4.92519	2.20754	1.92067	3.4198	6.92576	54.6436	2920.76	93.8986	2.80088	116.283	3.90425	14.6979	40.7368	14.152	39.9637	57.6829	1.96462	1.92076	16.3357	15.66	2.09636	73.157	2.09513	1.53098	1.68727	1.36944	0.684481	0.47558	0	10.9587	15.3227	16.8234	9.66609	18.2957	20.2811	17.9179	60.0993	25.8226	11.1555	45.0706	569.728	7.43402	10.7307
BL14	R	51.6457	15.5271	25.7402	1.06182	2.20133	3.31174	1.93528	1.6914	2.83209	3.88141	28.2813	348.227	50.3962	0.400654	84.171	2.84623	15.8263	33.0667	12.3157	24.9819	51.3402	1.53859	1.89016	3.46627	7.26157	0.341209	66.4948	1.5659	1.3582	1.52623	1.19072	0.76692	0.525795	0	8.16776	13.9236	16.7567	10.983	13.1526	19.1044	12.1276	58.7141	17.8447	8.11921	25.5937	171.271	4.74201	7.34607
W74	R	37.9753	12.4486	20.0961	1.55557	2.55629	4.08791	1.33476	1.09335	2.16257	4.19117	40.7836	1671.64	80.1856	1.66246	86.982	3.92423	11.1314	33.2056	14.1614	39.2269	63.5836	2.28433	1.49935	13.6244	13.1416	1.59581	62.0215	1.74225	1.3779	1.57907	1.04498	0.59133	0.200242	0	8.11902	11.8481	15.6811	9.63606	21.1796	16.7479	13.3852	12.9486	28.8663	9.96848	31.8306	352.514	7.29655	11.9918
BL33	R	25.154	9.56669	18.0769	1.248	2.49465	3.0238	0.857198	0.692267	2.40571	4.39259	23.0498	717.605	52.5298	0.67959	76.694	2.49371	9.77467	40.2025	18.8224	28.5127	76.294	1.00682	1.07664	5.04414	7.13094	0.41588	60.6705	1.69466	1.24112	1.68188	1.12458	0.908947	1.85458	0	8.54884	12.2121	16.6352	12.9344	20.6472	13.2144	13.5331	70.2514	20.9539	9.95388	35.0141	280.033	5.1487	14.094
W49	R	42.6006	15.4896	22.3097	1.58134	3.2802	3.74197	1.11057	0.834566	4.2963	5.59844	73.8573	2528.16	57.3405	1.92926	223.687	4.69928	11.893	30.4389	10.5517	27.7422	55.5481	1.56091	1.62363	11.8348	11.8065	1.01941	57.6424	1.63275	1.32145	1.62881	1.36648	0.500818	1.0129	0	8.85092	13.5664	15.2129	10.0838	23.8602	14.8989	14.1155	103.846	26.6224	10.2721	40.8868	268.792	3.73558	5.91414
BL8	R	49.376	17.2778	26.3065	1.50211	2.86147	4.2316	1.56487	1.17162	4.88192	5.52699	64.1549	3761.35	69.4473	4.41157	177.501	4.52147	13.2154	34.2002	13.4233	29.522	63.2827	1.56402	1.83052	21.7109	13.9353	1.80652	59.5083	2.95552	1.39703	2.4421	3.47214	0.905464	1.41639	0	11.699	14.5235	21.1703	9.80609	19.6629	15.4899	14.9297	155.819	22.0744	29.7313	46.8499	408.96	5.77762	7.59181
W15	R	45.123	15.5222	22.5365	1.93444	4.03398	4.04397	1.52061	1.27038	4.39075	6.5245	95.3667	2411.24	76.7603	1.92971	246.819	4.57684	13.4938	35.6056	11.7421	31.0709	66.3892	2.88637	1.9341	10.9854	14.0828	1.26011	70.687	2.43355	1.45119	1.81179	1.4141	0.55278	1.02675	0	9.39566	15.6757	18.1726	9.82049	21.1744	16.8317	13.604	73.075	26.4269	9.38808	39.0359	269.505	4.07577	6.41486
W5	R	45.0815	16.9158	24.4859	1.40078	3.31958	3.95977	1.79347	1.41256	3.02532	4.93449	58.0123	1214.08	52.4827	1.43802	162.987	3.10766	11.5928	32.9493	12.981	26.8869	61.8553	2.3384	1.88339	9.77652	8.91921	0.623715	62.8961	3.13351	1.46391	1.9423	1.89663	1.11398	0.613064	0	9.68575	13.4826	20.9918	9.79462	17.855	17.0507	14.6157	12.667	19.2132	24.4999	34.7753	237.016	6.09545	7.54827
BL18	R	42.0564	12.4779	21.6581	1.39035	2.30504	3.64176	2.05022	1.65223	2.46995	5.2807	45.0148	2055.15	67.5383	2.06643	82.3238	3.50319	10.0942	27.526	12.0321	25.1795	59.0524	1.53517	1.64955	11.5981	9.04786	1.05732	71.3188	2.14512	1.30572	1.88378	2.70065	1.38555	1.23606	0	9.11646	11.9407	17.96	9.71617	16.5203	19.3285	14.8812	113.254	27.0767	36.9043	35.0356	373.883	7.56668	6.53247
BL48	R	30.4144	11.2508	20.8512	1.11391	2.02656	4.01448	0.78473	0.716728	1.7251	4.60047	27.9295	997.317	56.374	1.22009	67.8389	2.90254	10.6609	37.7642	17.5352	26.9655	77.2079	1.2572	1.17712	10.8842	8.677	0.535948	61.8758	2.46695	1.41213	2.14999	2.71172	1.91205	0.729336	0	9.93966	13.5222	15.4649	11.8892	20.5887	14.3417	15.2334	78.1084	21.1164	36.1924	37.528	313.964	5.79398	11.7559
BL16	R	38.1627	13.6429	23.1672	1.59484	2.14875	3.64272	1.34775	1.12268	2.15338	5.64931	38.963	1620.74	59.9003	1.75908	92.0006	2.91126	11.9593	35.2755	15.687	29.4657	64.5888	1.53476	1.49917	8.27659	10.6033	0.86764	65.2797	1.76468	1.35696	1.78903	1.19486	0.728164	0.239147	0	7.63616	11.5962	16.0866	9.55316	19.2768	15.7609	14.4153	24.1702	21.2346	10.1227	39.9277	353.17	4.87169	13.8396
W50	R	36.2712	12.2553	18.6421	1.44305	2.78565	3.51234	1.23441	1.07429	4.82155	4.17259	37.5016	761.446	60.5062	0.681721	159.572	3.06933	12.9579	32.9373	15.1126	30.9345	63.2523	1.43694	1.49944	6.36899	8.13794	0.536668	57.9963	1.89077	1.37517	1.58896	0.939493	0.690262	4.27493	0	8.08564	13.3123	18.1033	10.9564	15.1176	20.2246	13.5438	107.64	24.8894	9.15931	36.4691	246.814	6.33591	8.22407
W63	R	42.5786	14.7165	21.4053	1.93971	2.60891	3.91488	1.3437	1.09103	3.33582	5.26499	87.2195	3763.32	75.7556	4.02168	158.523	4.85595	10.4857	35.1252	12.9078	35.4911	69.4901	2.99331	1.74545	21.0365	22.1092	2.03029	65.3774	1.7646	1.46441	1.72318	1.193	0.695261	1.72541	0	8.79499	12.7963	18.5363	7.77063	24.2069	17.6049	14.3463	78.4358	21.1241	10.6151	47.508	490.701	5.89886	14.7075
W46	R	50.521	15.4799	26.1379	1.25112	1.87944	3.78494	2.1787	1.7569	2.33548	4.32664	30.3318	882.182	56.1775	0.912291	61.471	3.10634	21.7774	36.1824	13.7797	28.5764	59.8819	1.67119	1.85701	7.38634	9.03387	0.92462	56.1466	2.35395	1.38324	1.71941	1.19183	0.793875	0.456087	0	8.58755	14.6944	23.2854	10.9404	15.549	21.3028	20.1256	24.6838	25.1311	10.4781	62.265	429.288	6.69436	19.0758
G60	R	22.8919	8.53305	16.5258	1.3966	2.67607	4.03376	0.75136	0.615194	5.08576	5.24034	31.4137	2071.84	62.6152	3.21601	132.33	3.31576	3.69881	44.989	16.8135	43.1327	75.8997	1.30439	0.950048	17.574	10.2854	1.13155	75.143	2.06561	1.52565	2.04116	0.991986	0.929785	4.26408	0	8.21383	11.3874	16.1745	12.0673	38.0834	15.2458	20.5587	98.5677	35.3405	12.5665	40.9804	396.048	8.1302	19.653
19	R	45.8449	13.2988	23.8825	1.905	2.89244	3.59694	1.9018	1.53972	2.37067	5.5019	41.6726	454.183	52.7577	0.683223	140.574	4.32515	10.6183	35.1043	13.9116	25.3039	59.9532	2.03404	1.84316	7.32488	7.17097	0.249429	69.2837	2.43474	1.43944	1.69258	1.36814	0.679284	0.50622	0	8.7641	12.2508	16.6119	9.87702	14.1459	16.6144	11.3017	39.0582	13.4698	8.20294	27.0015	194.014	5.69634	10.0879
G56	R	29.701	10.8594	20.4461	1.26941	2.49351	3.69471	0.944269	0.77781	2.67309	4.70443	30.6923	1271.01	53.5861	1.58894	83.391	4.19004	5.32901	39.1389	16.0743	28.4263	71.2839	1.87136	1.32018	9.66571	10.6624	0.447325	58.0711	2.27143	1.61242	1.91459	2.39274	0.954528	1.47258	0	10.2747	12.3221	15.516	9.48436	29.8414	13.5677	16.2793	74.6149	26.7385	26.0973	40.0914	370.475	5.97888	13.4421
GR2	R	52.815	16.5439	27.1655	0.997039	2.15917	3.18377	1.7444	1.4612	1.97987	3.61713	25.1767	370.653	36.5128	0.465121	89.2959	3.03116	5.23359	29.579	13.055	21.4748	55.1283	1.51984	2.02593	5.89113	6.66615	0.335304	56.0335	3.3047	1.36427	1.62338	1.56242	1.54868	0.753121	0	10.1428	15.0037	17.9401	11.7308	11.6222	15.2128	10.5553	42.5049	17.0218	21.4014	22.7489	176.263	6.87825	8.27783
21	R	38.4413	12.0785	20.5227	1.25945	2.11249	3.40363	1.33146	1.1507	2.20352	4.453	24.5164	446.318	47.0943	0.752776	64.2959	3.12206	11.567	29.7041	12.4107	23.7215	54.3181	1.35139	1.48035	6.26605	6.72243	0.478652	62.9437	2.47714	1.30243	2.03161	3.34249	2.06975	1.30978	0	9.33083	11.1968	15.924	12.3557	18.8909	16.5008	14.6094	72.8856	21.8812	42.3853	33.1775	181.674	3.57105	9.63207
G51	R	37.7629	11.7471	20.4322	1.37914	2.47615	3.72993	1.07306	0.970142	2.56052	5.08293	33.2248	1168.69	59.225	1.19701	90.1203	3.15657	7.11167	30.9362	14.4447	26.9758	59.3569	1.47568	1.54339	9.60107	8.59351	0.849981	62.7706	2.89286	1.38379	2.01251	2.90261	1.55296	1.37228	0	9.48711	11.4304	17.5989	9.97682	20.5388	16.4275	14.5285	102.719	27.314	35.4898	33.1597	312.641	5.82009	13.3567
20	R	46.5399	14.3377	22.7957	1.48252	2.35384	3.16993	1.86112	1.56925	2.22468	4.90567	33.8203	466.982	45.1308	0.68732	135.069	3.47468	11.4238	36.1473	14.0179	28.4422	59.7182	1.71925	1.79323	7.26925	6.66315	0.212155	59.4189	2.41111	1.3154	1.58685	1.28126	0.707796	0.30899	0	7.96319	13.0286	15.8438	10.4095	15.4087	15.3401	12.5902	33.7805	14.8582	8.49503	30.8257	233.242	5.34505	12.7066
G47	R	32.4233	12.106	23.346	1.2145	2.11364	3.10407	1.12389	0.915595	2.18299	4.95699	19.9449	751.22	49.891	0.933039	68.024	2.77662	7.75583	43.3127	21.6664	32.9253	80.6553	1.20884	1.2927	9.27476	7.04314	0.348779	63.6051	2.25449	1.39808	1.78714	1.32977	0.94983	1.67326	0	10.7082	13.1663	17.1602	12.5496	26.9178	14.0993	14.1966	83.9965	21.1815	11.7878	42.6822	377.321	6.24039	16.269
G55	R	32.3417	11.8818	23.3933	1.59428	3.27411	3.4951	0.864868	0.631703	5.93696	4.59643	38.7964	1538.59	55.7043	1.16156	190.83	4.05015	6.84716	42.6314	15.8787	35.376	71.7481	1.91601	1.33167	7.10156	10.7847	0.696351	58.1843	2.08173	1.35918	1.93453	1.14193	1.06473	4.92856	0	9.9702	14.2936	17.458	13.484	34.0968	12.6694	16.1674	102.561	28.1348	11.487	35.1551	355.818	7.42386	14.7949
G59	R	24.2306	9.2621	17.0808	1.97581	3.15832	3.51708	1.08734	0.817472	3.82644	5.4541	44.0477	2303.92	58.8231	2.88443	122.397	3.60614	5.16719	43.0508	15.5872	32.3017	72.0735	1.71765	1.15097	12.2623	13.9293	1.16653	67.8628	2.61201	1.47916	2.19557	2.5022	1.86854	2.45267	0	8.35922	10.7802	15.236	8.44274	29.41	14.1617	16.8712	77.8913	21.3747	34.3727	47.6469	400.943	7.83534	17.3471
16	R	34.3178	13.467	21.949	1.33602	2.46529	4.01827	0.786251	0.634852	3.39255	5.12299	38.056	2686.2	56.187	2.83084	100.542	3.06771	8.84558	34.9033	15.3916	27.2156	67.7632	1.32863	1.3384	16.3378	8.96071	1.08824	55.0966	2.63824	1.442	2.34462	3.15564	1.11597	0.79014	0	10.0087	13.7962	15.8914	9.22907	23.8411	15.2037	15.3857	41.4418	22.3102	32.6312	41.665	385.403	6.63171	15.7058
G57	R	26.8636	10.4624	19.4457	1.33105	2.60239	3.57884	0.762856	0.545471	3.98663	4.82074	32.5874	2462.3	48.939	2.39319	104.575	3.3591	3.93386	41.7945	15.8803	31.7989	72.6528	1.21606	1.13371	11.3125	10.5707	0.573277	58.9101	2.45523	1.42688	1.91245	1.53809	1.4975	3.74599	0	10.7726	11.6333	17.2586	9.98426	31.6801	12.4532	17.193	86.1598	21.4607	24.0525	47.5858	291.11	5.10756	16.9485
G58	R	28.8083	11.7293	21.9028	1.48926	2.03917	3.62075	1.09864	0.956315	3.23245	5.34599	51.1566	4733.95	66.7698	4.21901	83.4711	3.77151	4.91996	42.4129	15.1495	34.3425	78.6297	1.5536	1.14494	18.9176	13.725	3.0143	79.5738	2.18716	1.49651	2.12936	1.30267	0.72026	0.468493	0	8.38114	12.784	17.2195	8.30996	30.5824	13.9566	19.3515	51.0323	27.5169	12.2236	53.9682	423.787	5.93533	19.1197
G53	R	33.1839	11.2373	18.021	1.20566	1.6923	3.27351	0.660876	0.586428	1.91179	3.74995	35.0111	2215.44	57.8001	1.88296	75.9407	2.9677	12.2479	31.0052	12.0002	27.2887	58.4779	1.1587	1.20093	13.8581	10.889	1.34227	54.2583	2.7523	1.266	1.99569	0.877769	1.50599	2.57227	0	11.2637	14.7186	14.8572	10.681	23.672	17.1609	17.7673	33.3595	26.9394	48.0572	43.3326	277.425	6.0073	12.4112
[truncated: 6 more columns]
