# Supplementary material for: Non-targeted blood metabolomics of giraffe and white rhinoceros by 1 H nuclear magnetic resonance spectroscopy
Source: Research Square preprint supplement (doi:10.21203/rs.3.rs-7722349/v1), 2025-10-18
Supplement: Supplementary file 2 [file 9ea3d50caae34603835e7229.docx]

Non-targeted blood metabolomics of giraffe and white rhinoceros by 1H nuclear magnetic resonance spectroscopy

G. Osthoff*a, Mason, S.b, Schmidt, L.a, Tordiffe, A.c, Deacon, Fd

**Supplimentary Weather data**

Table 1 Suppl and 2 Suppl show the rainfall received at weather stations surrounding Rooiport reserve in 2017 and 2018. The rainfall from all the stations was averaged in order to determine the possible amount of rainfall received by the reserve. The amount of rainfall one month prior to the sampling dates was also included to account for new immediate plant growth which the giraffes would then consume. Samples were taken from the giraffes on 1st October 2017 and again on 4th November 2018. The stations included Kimberly, Vaalharts, Barkly West, and Delportshoop. Year 2018 (319.28mm) received less rainfall than year 2017 (370.35mm). Seasonal rainfall data was also included to account for seasonal plant growth. Year 2017 was part of a series of dry years, and 2018 continued to be dry.

Table 3 Suppl and 4 Suppl show the average temperatures (°C) at weather stations surrounding Rooiport reserve in 2017 and 2018. The temperature data was also included to determine the possibility of extreme temperatures placing stress on the giraffes and therefore affecting the the serum metabolite results.

Table 1 Suppl: Rainfall (mm) at weather stations surrounding Rooiport reserve in 2017

| Stations | Year average1 | Five months prior2 | One month prior3 | Winter4 | Spring5 |
| --- | --- | --- | --- | --- | --- |
| Kimberley | 361 | 9 | 6 | 0 | 37 |
| Vaalharts | 443 | 38 | 26 | 0 | 73 |
| Barkly West | 343.4 | 37.5 | 36.5 | 0 | 55.9 |
| Delportshoop | 334 | 0 | 0 | 0 | 0 |
| Average | 370.35 | 21.13 | 17.13 | 0 | 41.48 |
| 11st October 2016 to 1st October 2017  21st May 2017 to 1st October 2017  31st Septemeber 2017 to 1st October 2017  4 1st June 2017 to 31st August 2017  5 1st September 2017 to 30th November 2017  (South African Weather Service, 2019) | | | | | |

Table 2 Suppl: Rainfall (mm) at weather stations surrounding Rooiport reserve in 2018

| Stations | Year average1 | Five months prior2 | One month prior3 | Winter4 | Spring5 |
| --- | --- | --- | --- | --- | --- |
| Kimberley | 294 | 5 | 2 | 0 | 20 |
| Vaalharts | 480 | 15 | 6 | 8 | 9 |
| Barkly West | 328.9 | 12.7 | 4 | 6.5 | 8.7 |
| Delportshoop | 174.2 | 9.2 | 6 | 3.1 | 6.1 |
| Average | 319.28 | 10.48 | 4.5 | 4.4 | 10.95 |
| 11st October 2017 to 4th November 2018  21st June 2018 to 4th November 2018  31st October 2018 to 4th November 2018  4 1st June 2018 to 31st August 2018  5 1st September 2018 to 30th November 2018  (South African Weather Service, 2019) | | | | | |

Table 3 Suppl: Average temperatures (°C) at weather stations surrounding Rooiport reserve in 2017

| Stations | September Min | September Max | October Min | October Max | 1st October Min | 1st October Max |
| --- | --- | --- | --- | --- | --- | --- |
| Kimberley | 8.4 | 29.5 | 9.3 | 27.6 | 11.7 | 27.7 |
| Postmasburg | 8.8 | 28.8 | 9.4 | 26.8 | 16.1 | 29.1 |
| Vaalharts | 8.1 | 29.8 | 9.5 | 27.9 | 14 | 27.7 |
| Average | 8.4 | 29.4 | 9.4 | 27.4 | 13.9 | 28.2 |
| (South African Weather Service, 2019) | | | | | | |

Table 4 Suppl: Average temperatures (°C) at weather stations surrounding Rooiport reserve in 2018

| Stations | October Min | October Max | November Min | November Max | 4th November Min | 4th November Max |
| --- | --- | --- | --- | --- | --- | --- |
| Kimberley | 12.2 | 31 | 14.5 | 33.3 | 16.1 | 33.5 |
| Postmasburg | 14.4 | 32.4 | 15.8 | 34.8 | 17.1 | 32.9 |
| Vaalharts | 10.6 | 30.9 | 13.2 | 33.2 | 15.2 | 32.5 |
| Average | 12.4 | 31.4 | 14.5 | 33.8 | 16.1 | 33.0 |
| (South African Weather Service, 2019) | | | | | | |
